# Supplementary material
Source: ML conference proceedings conference paper supplement (https://proceedings.neurips.cc/paper_files/paper/2020/hash/4db73860ecb5533b5a6c710341d5bbec-Abstract.html)
Supplement: Supplementary file [file 4db73860ecb5533b5a6c710341d5bbec-Supplemental.zip]

## 334 A Proofs

335 **Theorem 1** (Permutation Equivariant ODE) Given an ODE  $\dot{z}(t) = f(z(t), t)$ ,  $z(t) \in \mathcal{X}^n$  defined  
 336 in an interval  $[t_1, t_2]$ . If function  $f(z(t), t)$  is permutation equivariant w.r.t.  $z(t)$ , then the solution of  
 337 the ODE, i.e.,  $z^*(t)$ ,  $t \in [t_1, t_2]$  is permutation equivariant w.r.t. the initial value  $z(t_1)$ . We call the  
 338 ODE with permutation equivariant properties as ExODE.

339 *Proof.* For any permutation  $\pi(\cdot)$ , we have

$$\begin{aligned} \pi(z^*(t)) &\stackrel{(1)}{=} \pi(z(t_1)) + \pi\left(\int_{t_1}^t f(z(\tau), \tau) d\tau\right) \\ &\stackrel{(2)}{=} \pi(z(t_1)) + \int_{t_1}^t \pi(f(z(\tau), \tau)) d\tau \\ &\stackrel{(3)}{=} \pi(z(t_1)) + \int_{t_1}^t f(\pi(z(\tau)), \tau) d\tau \\ &\stackrel{(4)}{=} g(\pi(z(t_1)), f, t) \end{aligned}$$

340

□

## 341 B Temporal Set Modeling

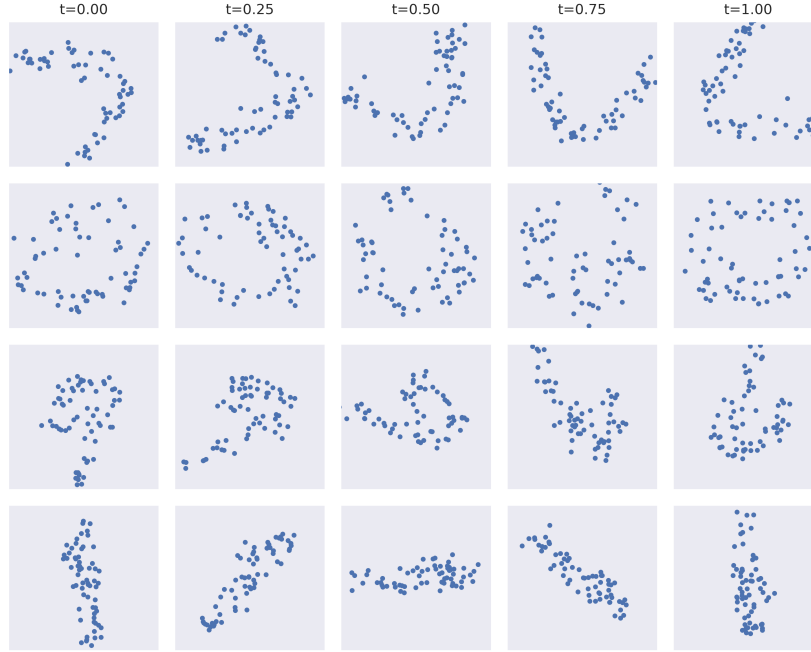

Figure 6: Additional samples from our temporal VAE.

## 342 C Training details

### 343 C.1 Point cloud classification

344 The details of network architecture we used are shown in Table 3. All the models are trained using  
 345 Adam optimizer with  $\beta_1 = 0.9$  and  $\beta_2 = 0.999$ . The learning rate and batch size are set to  $1e-3$   
 346 and 64 in all experiments. We use the fourth order Runge-Kutta solver to solve the ExNODE in our

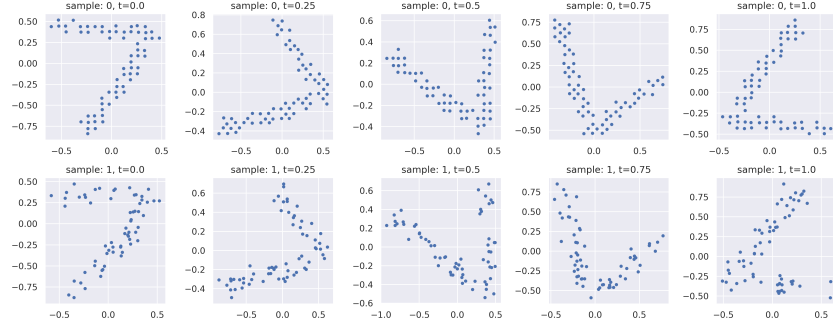

Figure 7: Conditional samples using the encoded  $z_0$  of the first row.

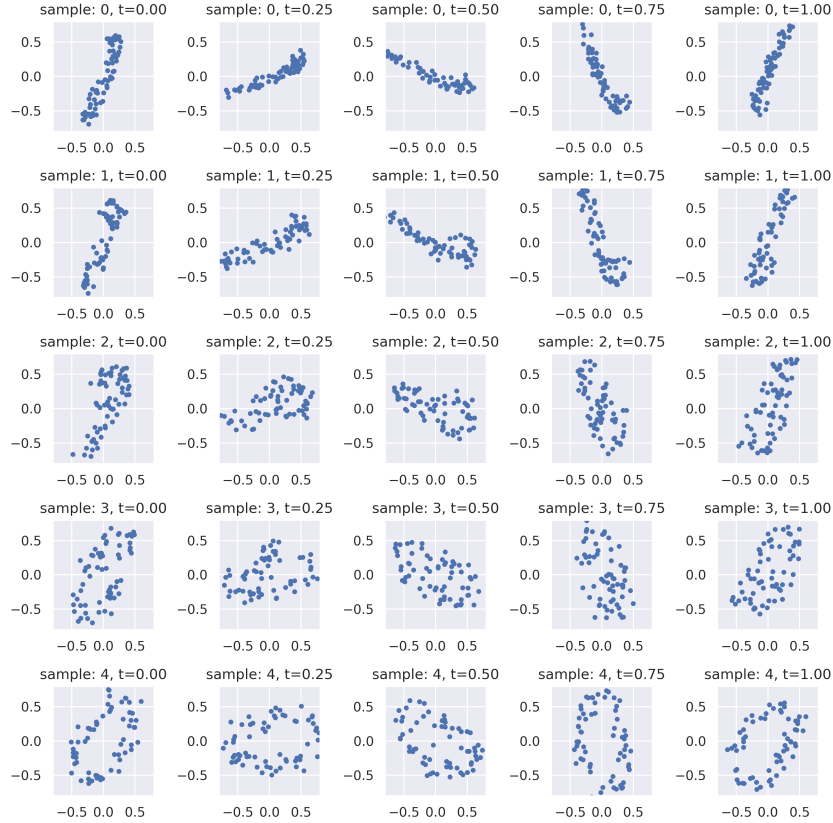

Figure 8: Interpolate  $z_0$  from two different temporal sets (the first and the last row).

347 model, and the numeric tolerance is set to  $1e-5$  in all experiments. We train our model on a single  
 348 NVIDIA Tesla V100 GPU. For generalization, we randomly rotate and scale each set during training  
 349 with  $n = 1000$  points.

## 350 C.2 Set generation

351 The details of network architecture are provided in Table 3. The batch is set to 128 in all experiments.  
 352 We train our model using Adam optimizer with an initial learning rate of  $1e-3$  which we decay by a  
 353 factor of 0.5 every 100 epochs. We use `dopri5` solver to solve the ODE with numeric tolerance of  
 354  $1e-5$ .

### 355 C.3 Set temporal model

356 The dimension of the latent state variable  $z_0$  is set to 128. We randomly sample 64 points uniformly  
 357 from active pixels of MNIST dataset as a set. We train our model using Adam optimizer with learn  
 358 rate 1e-3,  $\beta_1 = 0.9$  and  $\beta_2 = 0.999$ , respectively. The batch size is set to 128 in all experiments.  
 359 We use `dopri5` solver to solve the ODE used in our model, and the relative and absolute numeric  
 360 tolerance are set to 1e-3 and 1e-4, respectively. All the models are trained on a single NVIDIA Tesla  
 361 V100 GPU.

362 **Decoder** The decoder models the reconstruction likelihood  $p(\mathbf{x}_{t_i}|z_{t_i})$ . We share the same decoder  
 363 at different time. The `concatsquash`-like linear layers are used in our CNF decoder:

$$CCS(\mathbf{x}, z, t) = (W_x \mathbf{x} + b_x) * \text{gate} + \text{bias},$$

364 where  $\text{gate} = \sigma(W_{tt}t + W_{tz}z + b_t)$  and  $\text{bias} = W_{bt}t + W_{bz}z + b_b t$ . In our experiment, we stack  
 365 four `concatsquash` linear layers to model the dynamics  $g_{\theta_d}$ . We also use Tanh activation to connect  
 366 the consecutive `concatsquash` linear layers. For more details of network architecture used in our  
 367 model, see Table 3.

## 368 D Architecture

369 See next page.

Table 3: Detailed network architecture used in our experiments for different tasks.

| Model                                            | Dataset      |                                                                                                                   | Architecture                                                                                                                                                                                                                                                                                                                                                                                                                                                                                                                                                                                                                                                                                                                                                                                                     |
|--------------------------------------------------|--------------|-------------------------------------------------------------------------------------------------------------------|------------------------------------------------------------------------------------------------------------------------------------------------------------------------------------------------------------------------------------------------------------------------------------------------------------------------------------------------------------------------------------------------------------------------------------------------------------------------------------------------------------------------------------------------------------------------------------------------------------------------------------------------------------------------------------------------------------------------------------------------------------------------------------------------------------------|
| PointCloud Classification<br>(deepset block)     | ModelNet40   | Input<br>FE                                                                                                       | $64 \times 3 \times 100$ or 1000<br>Conv1d 64x1(stride 1) BN(64) Tanh<br>Conv1d 256x1(stride 1) BN(256) Tanh<br>FC (512) Tanh FC(512) FC(256)                                                                                                                                                                                                                                                                                                                                                                                                                                                                                                                                                                                                                                                                    |
|                                                  |              | ExNODE<br>Pooling<br>Prediction                                                                                   | Max(1) Flatten<br>FC(128) BN(128) Tanh FC(40)                                                                                                                                                                                                                                                                                                                                                                                                                                                                                                                                                                                                                                                                                                                                                                    |
| PointCloud Classification<br>(transformer block) | ModelNet40   | Input<br>FE                                                                                                       | $64 \times 3 \times 100$ or 1000<br>Conv1d 64x1(stride 1) BN(64) Tanh<br>Conv1d 256x1(stride 1) BN(256) Tanh                                                                                                                                                                                                                                                                                                                                                                                                                                                                                                                                                                                                                                                                                                     |
|                                                  |              | ExNODE<br><br>Pooling<br>Prediction                                                                               | K: FC(256) Tanh FC(256)<br>Q: FC(256) Tanh FC(256)<br>V: FC(256) Tanh FC(256)<br>FC(256)<br>Max(1) Flatten<br>FC(128) BN(128) Tanh FC(40)                                                                                                                                                                                                                                                                                                                                                                                                                                                                                                                                                                                                                                                                        |
| Set Generation                                   | SpatialMNIST | Input<br>ExNODE $\times 12$                                                                                       | $128 \times 50 \times 2$<br>K: FC(128) Tanh FC(128) Tanh FC(128)<br>Q: FC(128) Tanh FC(128) Tanh FC(128)<br>V: FC(128) Tanh FC(128) Tanh FC(128)<br>FC(2)                                                                                                                                                                                                                                                                                                                                                                                                                                                                                                                                                                                                                                                        |
| Set Generation                                   | ModelNet40   | Input<br>ExNODE $\times 12$                                                                                       | $128 \times 512 \times 2$<br>K: FC(128) Tanh FC(128) Tanh FC(128)<br>Q: FC(128) Tanh FC(128) Tanh FC(128)<br>V: FC(128) Tanh FC(128) Tanh FC(128)<br>FC(3)                                                                                                                                                                                                                                                                                                                                                                                                                                                                                                                                                                                                                                                       |
| Temporal Set Model                               | SpatialMNIST | Input<br>Encoder( $\phi$ )<br><br>RNN<br>RNN_to_ $z_0$<br><br>Latent: $z_0$<br>ODE( $z_t$ )<br>ODE( $\hat{x}_t$ ) | $128 \times 64 \times 2$<br>Conv1d 128x1(stride 1) BN(128) ReLU<br>Conv1d 128x1(stride 1) BN(128) ReLU<br>Conv1d 256x1(stride 1) BN(256) ReLU<br>Conv1d 512x1(stride 1) BN(512) Max<br>GRU(513, 512) (Concat $\Delta t$ as Input)<br>mean: FC(256) BN(256) RELU<br>FC(128) BN(128) RELU FC(128)<br>std: FC(256) BN(256) ReLU<br>FC(128) BN(128) ReLU FC(128) Exp<br>128<br>FC(256) Tanh FC(256) Tanh FC(128)<br>Concatsquash Linear $\times 4$ :<br>1) FC(2, 512) gate: FC(129, 512, bias=F)<br>bias: FC(129, 512) (Concat $t$ and $z$ )<br>2) FC(512, 512) gate: FC(129, 512, bias=F)<br>bias: FC(129, 512) (Concat $t$ and $z$ )<br>3) FC(512, 512) gate: FC(129, 512, bias=F)<br>bias: FC(129, 512) (Concat $t$ and $z$ )<br>4) FC(512, 2) gate: FC(129, 2, bias=F)<br>bias: FC(129, 2) (Concat $t$ and $z$ ) |
